# Supplementary material
Source: Springer Nature journal article supplement (https://www.springermedizin.de/resource/supplementary/12936_2011_1946_MOESM22_ESM.pdf/9542110)
Supplement: MOESM22 [file 9542110]

Consérvese a menos de 30°C  
Los medicamentos deben conservarse fuera  
del alcance de los niños

Conservar au-dessous de 30°C.  
Les médicaments doivent être tenus hors  
de la portée des enfants

artemether, 20 mg,  
lumefantrín, 120 mg,  
excip. pro compr.

091  
400  
876

**Coartem® 20/120**

artemether.  
lumefantrín.

**NOVARTIS**

Antimalarial agent  
Antimalariamittel

24 Tabl. 20/120 mg

Coartem® 20/120  
24 Tabl./compr. 20/120 mg

**Coartem® 20/120**

24 Tabl./compr. 20/120 mg

Store below 30°C  
Medicines should be kept out of the reach  
of children

Unter 30°C lagern  
Arzneimittel sollen für Kinder unerschbar  
aufbewahrt werden

Manufactured by  
Beijing Novartis Pharma Ltd, Beijing, China  
for Novartis Pharma AG, Basle, Switzerland,  
under licence from the PRC

74802  
dfes

**Coartem® 20/120**

artemether.  
lumefantrín.

**NOVARTIS**

Antipalúdico  
Antipaludique

24 compr. 20/120 mg

Coartem® 20/120  
EXP  
MFD  
LOT
